# Supplementary material
Source: MDPI journal article supplement (https://www.mdpi.com/1424-2818/11/2/26)
Supplement: s1 [file s1]

### Supplementary Figure captions:

**Figure S1:** Examples of multibeam bathymetry and backscatter raster datasets and their derivatives for the Northern Submerged Shoals indicate the range in bathymetry, backscatter and derivative values (see Table 1 for list of derivatives and their ecological contexts).

**Figure S2:** Comparing average epibenthic habitat measures in the field of view by reef. Percent cover of each category is estimated out of a total sum of 100 for each site. Four locations (Myrmidon Reef, Northern Submerged Shoals, Viper Reef and an inter-reefal transect) are included in this comparison, but there were no “Deep” sites at Viper Reef. Note: *n* varies per bar, 1-11 sites.

**Figure S3:** Comparing average substratum habitat measures in the field-of-view by reef. Percent cover of each category is estimated out of a total sum of 100 for each site. Four locations (Myrmidon Reef, Northern Submerged Shoals, Viper Reef and an inter-reefal transect) are included in this comparison, but there were no “Deep” sites at Viper Reef. Note: *n* varies per bar, 1-11 sites.

**Figure S4:** Nonmetric Multidimensional Scaling (nMDS) shows patterns between fish community composition and environmental variables, including epibenthic and substratum measured in the underwater camera field-of-view and multibeam echo sounder measured variables for four locations along the Great Barrier Reef shelf-edge with the fish species responsible for the variation among locations. Shallower sites nMDS (54-115 m) with ordination from Bray-Curtis dissimilarities in species abundance data, transformed using fourth-root transformation and standardised using Wisconsin-double standardisation.

**Figure S5:** Nonmetric Multidimensional Scaling (nMDS) shows patterns between fish community composition and environmental variables, including epibenthic and substratum measured in the underwater camera field-of-view and multibeam echo sounder measured variables for four locations along the Great Barrier Reef shelf-edge with the fish species responsible for the variation among locations. Middle sites nMDS (128-160 m) with ordination from Bray-Curtis dissimilarities in species abundance data, transformed using fourth-root transformation and standardised using Wisconsin-double standardisation.

**Figure S6:** Nonmetric Multidimensional Scaling (nMDS) shows patterns between fish community composition and environmental variables, including epibenthic and substratum measured in the underwater camera field-of-view and multibeam echo sounder measured variables for four locations along the Great Barrier Reef shelf-edge with the fish species responsible for the variation among locations. Deeper sites nMDS (179-260 m) with ordination from Bray-Curtis dissimilarities in species abundance data, transformed using fourth-root transformation and standardised using Wisconsin-double standardisation.

**Table S1.** Ecology of deep-reef fishes from Baited Remote Underwater Video Station videos. Only species identified to species-level are included, listed by family. CAAB codes refer to the Codes for Australian Aquatic Biota [119]. Australian Standard Names are provided, where there is no Australian Standard Name, the Fishbase common name is provided and noted with \*. Trophic groups and known habitat information links from Fishbase database [115]. Trophic groups are divided as follows: BC = benthic-associated carnivores (e.g., benthic crustaceans and infauna, small fish may be a portion of diet), PL = planktivores, H=herbivores, PI= Piscivores, GC = Generalist carnivores (i.e., larger range of diet items, may include fish and benthic crustaceans). For some species, the trophic group of a species is inferred based on the known diet of close family members\*\*. Known habitat is summarized from Fishbase, including original references. Fisheries species designation is also from Fishbase with the original references listed if provided. Fisheries status includes major or minor commercial, recreational or aquarium trade fisheries as these may pose a threat to general or local populations.

| Species                                                | CAAB Code | Australian Standard Name | Trophic Group | Fishbase Trophic and Habitat Information             | Fisheries |
|--------------------------------------------------------|-----------|--------------------------|---------------|------------------------------------------------------|-----------|
| <b>Carcharhinidae</b>                                  |           |                          |               |                                                      |           |
| <i>Carcharhinus albimarginatus</i> (Rüppell, 1837)     | 37018027  | Silvertip Shark          | GC            | <a href="#">Fishbase/Carcharhinus-albimarginatus</a> | Yes       |
| <i>Carcharhinus amblyrhynchos</i> (Bleeker, 1856)      | 37018030  | Grey Reef Shark          | GC            | <a href="#">Fishbase/Carcharhinus-amblyrhynchos</a>  | Yes       |
| <i>Carcharhinus plumbeus</i> (Nardo, 1827)             | 37018007  | Sandbar Shark            | GC            | <a href="#">Fishbase/Carcharhinus-plumbeus</a>       | Yes       |
| <i>Loxodon macrorhinus</i> Müller & Henle, 1839        | 37018005  | Sliteye Shark            | GC            | <a href="#">Fishbase/loxodon-macrorhinus</a>         | Yes       |
| <i>Triaenodon obesus</i> (Rüppell, 1837)               | 37018038  | Whitetip Reef Shark      | GC            | <a href="#">Fishbase/triaenodon-obeus</a>            | Yes       |
| <b>Sphyrnidae</b>                                      |           |                          |               |                                                      |           |
| <i>Sphyrna lewini</i> (Griffith & Smith, 1834)         | 37019001  | Scalloped Hammerhead     | GC            | <a href="#">Fishbase/Sphyrna-lewini</a>              | Yes       |
| <b>Dasyatidae</b>                                      |           |                          |               |                                                      |           |
| <i>Taeniurops meyeri</i> (Müller & Henle, 1841)        | 37035017  | Blotched Fantail Ray     | BC            | <a href="#">Fishbase/taeniurops-meyeri</a>           | Yes       |
| <b>Muraenidae</b>                                      |           |                          |               |                                                      |           |
| <i>Gymnothorax berndti</i> Snyder, 1904                | 37060089  | Y-Patterned Moray*       | GC**          | <a href="#">Fishbase/gymnothorax-berndti</a>         |           |
| <i>Gymnothorax elegans</i> Bliss, 1883                 | 37060090  | Elegant Moray*           | GC**          | <a href="#">Fishbase/gymnothorax-elegans</a>         |           |
| <i>Gymnothorax intesi</i> (Fourmanoir & Rivaton, 1979) | 37060076  | Whitetip Moray           | GC**          | <a href="#">Fishbase/gymnothorax-intesi</a>          |           |
| <i>Gymnothorax prionodon</i> Ogilby, 1895              | 37060049  | Sawtooth Moray           | GC**          | <a href="#">Fishbase/gymnothorax-prionodon</a>       |           |
| <b>Fistulariidae</b>                                   |           |                          |               |                                                      |           |
| <i>Fistularia commersonii</i> Rüppell, 1838            | 37278001  | Smooth Flutemouth        | BC            | <a href="#">Fishbase/fistularia-commersonii@</a>     | Yes       |
| <b>Serranidae</b>                                      |           |                          |               |                                                      |           |

| Species                                                  | CAAB Code    | Australian Standard Name    | Trophic Group | Fishbase Trophic and Habitat Information              | Fisheries |
|----------------------------------------------------------|--------------|-----------------------------|---------------|-------------------------------------------------------|-----------|
| <i>Epinephelus cyanopodus</i> (Richardson, 1846)         | 3731114<br>5 | Purple Rockcod              | GC            | <a href="#">Fishbase/epinephelus-cyanopodus</a>       | Yes       |
| <i>Epinephelus morrhua</i> (Valenciennes, 1833)          | 3731115<br>1 | Comet Grouper               | GC            | <a href="#">Fishbase/epinephelus-morrhua</a>          | Yes       |
| <i>Plectranthias kelloggi</i> Jordan & Evermann, 1903    | 3731121<br>0 | Eastern Flower Porgy*       | Unknown       | <a href="#">Fishbase/plectranthias-kelloggi</a>       |           |
| <i>Plectropomus leopardus</i> (Lacépède, 1802)           | 3731107<br>8 | Common Coral Trout          | PI            | <a href="#">Fishbase/plectropomus-leopardus</a>       | Yes       |
| <i>Plectropomus laevis</i> (Lacépède, 1801)              | 3731107<br>9 | Bluespotted Coral Trout     | PI            | <a href="#">Fishbase/plectropomus-laevis</a>          | Yes       |
| <i>Pseudanthias engelhardi</i> (Allen & Starck, 1982)    | 3731111<br>5 | Barrier Reef Basslet        | Unknown       | <a href="#">Fishbase/pseudanthias-engelhardi</a>      |           |
| <i>Variola louti</i> (Forsskål, 1775)                    | 3731116<br>6 | Yellowedge Coronation Trout | GC            | <a href="#">Fishbase/variola-louti</a>                | Yes       |
| Malacanthidae                                            |              |                             |               |                                                       |           |
| <i>Hoplolatilus marcosi</i> Burgess, 1978                | 3733101<br>2 | Redback Sand Tilefish*      | BC**          | <a href="#">Fishbase/hoplolatilus-marcosi</a>         |           |
| Echeneidae                                               |              |                             |               |                                                       |           |
| <i>Echeneis naucrates</i> Linnaeus, 1758                 | 3733600<br>1 | Sharksucker                 | PI            | <a href="#">Fishbase/echeneis-naucrates</a>           | Yes       |
| Carangidae                                               |              |                             |               |                                                       |           |
| <i>Carangoides caeruleopinnatus</i> (Rüppell, 1830)      | 3733702<br>1 | Onion Trevally              | PI            | <a href="#">Fishbase/carangoides-coeruleopinnatus</a> | Yes       |
| <i>Carangoides chrysophrys</i> (Cuvier, 1833)            | 3733701<br>1 | Longnose Trevally           | PI            | <a href="#">Fishbase/carangoides-chrysophrys</a>      | Yes       |
| <i>Carangoides dinema</i> Bleeker 1851                   | 3733707<br>8 | Shadow Trevally             | PI            | <a href="#">Fishbase/carangoides-dinema</a>           | Yes       |
| <i>Carangoides ferdau</i> (Forsskål, 1775)               | 3733706<br>8 | Blue Trevally               | BC            | <a href="#">Fishbase/carangoides-ferdau</a>           | Yes       |
| <i>Carangoides fulvoguttatus</i> (Forsskål, 1775)        | 3733703<br>7 | Turrun                      | BC            | <a href="#">Fishbase/carangoides-fulvoguttatus</a>    | Yes       |
| <i>Carangoides orthogrammus</i> (Jordan & Gilbert, 1882) | 3733705<br>7 | Thicklip Trevally           | BC            | <a href="#">Fishbase/carangoides-orthogrammus</a>     | Yes       |
| <i>Carangoides plagiotaenia</i> Bleeker, 1857            | 3733707<br>0 | Barcheek Trevally           | GC            | <a href="#">Fishbase/carangoides-plagiotaenia</a>     | Yes       |
| <i>Caranx ignobilis</i> (Forsskål, 1775)                 | 3733702<br>7 | Giant Trevally              | GC            | <a href="#">Fishbase/caranx-ignobilis</a>             | Yes       |
| <i>Caranx melampygus</i> Cuvier, 1833                    | 3733705<br>0 | Bluefin Trevally            | GC            | <a href="#">Fishbase/caranx-melampygus</a>            | Yes       |
| <i>Gnathanodon speciosus</i> (Forsskål, 1775)            | 3733701<br>2 | Golden Trevally             | PI            | <a href="#">Fishbase/gnathanodon-speciosus</a>        | Yes       |
| <i>Pseudocaranx dentex</i> (Bloch & Schneider, 1801)     | 3733706<br>2 | Silver Trevally             | PL, BC        | <a href="#">Fishbase/pseudocaranx-dentex</a>          | Yes       |
| <i>Seriola dumerili</i> (Risso, 1810)                    | 3733702<br>5 | Amberjack                   | GC            | <a href="#">Fishbase/seriola-dumerili</a>             | Yes       |
| <i>Seriola rivoliana</i> Valenciennes, 1833              | 3733705<br>2 | Highfin Amberjack           | GC            | <a href="#">Fishbase/seriola-rivoliana</a>            | Yes       |
| Lutjanidae                                               |              |                             |               |                                                       |           |
| <i>Aphareus rutilans</i> Cuvier, 1830                    | 3734600<br>1 | Rusty Jobfish               | GC            | <a href="#">Fishbase/aphareus-rutilans</a>            | Yes       |

| Species                                                              | CAAB Code    | Australian Standard Name           | Trophic Group | Fishbase Trophic and Habitat Information                | Fisheries |
|----------------------------------------------------------------------|--------------|------------------------------------|---------------|---------------------------------------------------------|-----------|
| <i>Aprion virescens</i><br>Valenciennes, 1830                        | 3734602<br>7 | Green<br>Jobfish                   | GC            | <a href="#">Fishbase/aprion-virescens</a>               | Yes       |
| <i>Etelis carbunculus</i><br>Cuvier, 1828                            | 3734601<br>4 | Ruby<br>Snapper                    | GC            | <a href="#">Fishbase/etelis-carbunculus</a>             | Yes       |
| <i>Lipocheilus carnolabrum</i><br>(Chan, 1970)                       | 3734603<br>1 | Tang's<br>Snapper                  | GC            | <a href="#">Fishbase/lipocheilus-carnolabrum</a>        | Yes       |
| <i>Lutjanus bohar</i><br>(Forsskål, 1775)                            | 3734602<br>9 | Red Bass                           | GC            | <a href="#">Fishbase/lutjanus-bohar</a>                 | Yes       |
| <i>Lutjanus sebae</i><br>(Cuvier, 1816)                              | 3734600<br>4 | Red<br>Emperor                     | GC            | <a href="#">Fishbase/lutjanus-sebae</a>                 | Yes       |
| <i>Paracaesio kusakarii</i><br>Abe, 1960                             | 3734606<br>0 | Saddleback<br>Snapper              | GC            | <a href="#">Fishbase/paracaesio-kusakarii</a>           | Yes       |
| <i>Pristipomoides argyrogrammicus</i><br>(Valenciennes, 1831)        | 3734605<br>4 | Ornate<br>Jobfish                  | GC            | <a href="#">Fishbase/pristipomoides-argyrogrammicus</a> | Yes       |
| <i>Pristipomoides auricilla</i><br>(Jordan, Evermann & Tanaka, 1927) | 3734605<br>9 | Goldflag<br>Snapper                | PI, PL        | <a href="#">Fishbase/pristipomoides-auricilla</a>       | Yes       |
| <i>Pristipomoides filamentosus</i><br>(Valenciennes, 1830)           | 3734603<br>2 | Rosy<br>Snapper                    | GC            | <a href="#">Fishbase/pristipomoides-filamentosus</a>    | Yes       |
| <i>Pristipomoides multidens</i><br>(Day, 1870)                       | 3734600<br>2 | Goldbanded<br>Snapper              | GC            | <a href="#">Fishbase/pristipomoides-multidens</a>       | Yes       |
| <i>Pristipomoides sieboldii</i><br>(Bleeker, 1857)                   | 3734606<br>4 | Lavender<br>Snapper                | GC            | <a href="#">Fishbase/pristipomoides-sieboldii</a>       | Yes       |
| <i>Pristipomoides typus</i><br>Bleeker, 1852                         | 3734601<br>9 | Sharptooth<br>Snapper              | GC            | <a href="#">Fishbase/pristipomoides-typus</a>           | Yes       |
| <i>Symphorus nematophorus</i><br>(Bleeker, 1860)                     | 3734601<br>7 | Chinamanfish                       | PI            | <a href="#">Fishbase/symphorus-nematophorus</a>         | Yes       |
| Caesionidae                                                          |              |                                    |               |                                                         |           |
| <i>Pterocaesio marri</i><br>Schultz, 1953                            | 3734606<br>8 | Bigtail<br>Fusilier                | PL            | <a href="#">Fishbase/pterocaesio-marri</a>              | Yes       |
| Nemipteridae                                                         |              |                                    |               |                                                         |           |
| <i>Nemipterus balinensis</i><br>(Bleeker, 1859)                      | 3734703<br>9 | Bali<br>Threadfin<br>Bream         | BC**          | <a href="#">Fishbase/nemipterus-balinensis</a>          | Yes       |
| <i>Pentapodus aureofasciatus</i><br>Russell, 2001                    | 3734702<br>9 | Yellowstripe<br>Threadfin<br>Bream | BC**          | <a href="#">Fishbase/pentapodus-aureofasciatus</a>      |           |
| <i>Pentapodus nagasakiensis</i><br>(Tanaka, 1915)                    | 3734701<br>2 | Japanese<br>Threadfin<br>Bream     | BC            | <a href="#">Fishbase/pentapodus-nagasakiensis</a>       | Yes       |
| Lethrinidae                                                          |              |                                    |               |                                                         |           |
| <i>Gymnocranius euanus</i><br>(Günther, 1879)                        | 3735102<br>2 | Paddletail<br>Seabream             | BC            | <a href="#">Fishbase/gymnocranius-euanus</a>            | Yes       |
| <i>Gymnocranius grandoculis</i><br>(Valenciennes, 1830)              | 3735100<br>5 | Robinson's<br>Seabream             | GC            | <a href="#">Fishbase/gymnocranius-grandoculis</a>       | Yes       |
| <i>Lethrinus laticaudis</i><br>Alleyne & Macleay, 1877               | 3735100<br>6 | Grass<br>Emperor                   | GC            | <a href="#">Fishbase/lethrinus-laticaudis</a>           | Yes       |
| <i>Lethrinus miniatus</i><br>(Forster, 1801)                         | 3735100<br>9 | Redthroat<br>Emperor               | GC            | <a href="#">Fishbase/lethrinus-miniatus</a>             | Yes       |
| <i>Lethrinus nebulosus</i><br>(Forsskål, 1775)                       | 3735100<br>8 | Spangled<br>Emperor                | GC            | <a href="#">Fishbase/lethrinus-nebulosus</a>            | Yes       |

| Species                                                    | CAAB Code    | Australian Standard Name    | Trophic Group | Fishbase Trophic and Habitat Information            | Fisheries               |
|------------------------------------------------------------|--------------|-----------------------------|---------------|-----------------------------------------------------|-------------------------|
| <i>Lethrinus olivaceus</i><br>Valenciennes, 1830           | 3735100<br>4 | Longnose Emperor            | GC            | <a href="#">Fishbase/lethrinus-olivaceus</a>        |                         |
| <i>Lethrinus ravus</i><br>Carpenter & Randall, 2003        | 3735103<br>1 | Drab Emperor                | Unknown       | <a href="#">Fishbase/lethrinus-ravus</a>            |                         |
| <i>Lethrinus rubrioperculatus</i><br>Sato, 1978            | 3735101<br>2 | Spotcheek Emperor           | GC            | <a href="#">Fishbase/lethrinus-rubrioperculatus</a> |                         |
| <i>Lethrinus semicinctus</i><br>Valenciennes, 1830         | 3735101<br>6 | Blackblotch Emperor         | GC            | <a href="#">Fishbase/lethrinus-semicinctus</a>      | Yes<br>(Carpenter 1997) |
| <i>Wattsia mossambica</i><br>(Smith, 1957)                 | 3735102<br>7 | Mozambique Seabream         | GC            | <a href="#">Fishbase/wattsia-mossambica</a>         | Yes<br>(Carpenter 1997) |
| Mullidae                                                   |              |                             |               |                                                     |                         |
| <i>Mulloidichthys pfluegeri</i><br>(Steindachner, 1900)    | 3735504<br>0 | Orange Goatfish             | BC            | <a href="#">Fishbase/mulloidichthys-pfluegeri</a>   | Yes                     |
| <i>Parupeneus heptacanthus</i><br>(Lacépède, 1802)         | 3735500<br>4 | Cinnabar Goatfish           | BC            | <a href="#">Fishbase/parupeneus-heptacanthus</a>    | Yes                     |
| <i>Parupeneus multifasciatus</i><br>(Quoy & Gaimard, 1825) | 3735502<br>6 | Banded Goatfish             | BC            | <a href="#">Fishbase/parupeneus-multifasciatus</a>  | Yes                     |
| <i>Parupeneus pleurostigma</i><br>(Bennett, 1831)          | 3735502<br>7 | Sidespot Goatfish           | BC            | <a href="#">Fishbase/parupeneus-pleurostigma</a>    | Yes                     |
| Chaetodontidae                                             |              |                             |               |                                                     |                         |
| <i>Heniochus diphreutes</i><br>Jordan, 1903                | 3736500<br>5 | Schooling Bannerfish        | PL            | <a href="#">Fishbase/heniochus-diphreutes</a>       | Aquarium                |
| Pomacanthidae                                              |              |                             |               |                                                     |                         |
| <i>Pomacanthus imperator</i><br>(Bloch, 1787)              | 3736501<br>4 | Emperor Angelfish           | BC            | <a href="#">Fishbase/pomacanthus-imperator</a>      | Yes & Aquarium          |
| <i>Pomacanthus semicirculatus</i><br>(Cuvier, 1831)        | 3736508<br>0 | Blue Angelfish              | BC            | <a href="#">Fishbase/pomacanthus-semicirculatus</a> | Yes & Aquarium          |
| Cirrhitidae                                                |              |                             |               |                                                     |                         |
| <i>Cyprinocirrhites polyactis</i><br>(Bleeker, 1875)       | 3737400<br>6 | Lyretail Hawkfish           | PL            | <a href="#">Fishbase/cyprinocirrhites-polyactis</a> | Aquarium                |
| Pomacentridae                                              |              |                             |               |                                                     |                         |
| <i>Chromis circumaurea</i><br>Pyle, Earle & Greene, 2008   | 3737215<br>3 | Gold-rim Chromis*           | PL**          | <a href="#">Fishbase/chromis-circumaurea</a>        |                         |
| <i>Chromis mirationis</i><br>Tanaka 1917                   | 3737204<br>8 | Japanese Puller             | PL            | <a href="#">Fishbase/chromis-mirationis</a>         |                         |
| <i>Chromis okamurai</i><br>Yamakawa & Randall, 1989        | 3737215<br>4 | Okinawa Chromis*            | PL**          | <a href="#">Fishbase/chromis-okamurai</a>           |                         |
| Labridae                                                   |              |                             |               |                                                     |                         |
| <i>Bodianus anthioides</i><br>(Bennett, 1832)              | 3738405<br>2 | Lyretail Pigfish            | BC            | <a href="#">Fishbase/bodianus-anthioides</a>        | Aquarium                |
| <i>Bodianus bennetti</i><br>Gomon and Walsh, 2016          | 3738421<br>9 | Lemon-striped Pygmy Hogfish | BC**          | <a href="#">Fishbase/bodianus-bennetti</a>          |                         |
| <i>Bodianus bimaculatus</i><br>Allen, 1973                 | 3738405<br>5 | Twospot Pigfish             | BC            | <a href="#">Fishbase/bodianus-bimaculatus</a>       | Aquarium                |
| <i>Bodianus izuensis</i><br>Araga & Yoshino, 1975          | 3738405<br>8 | Striped Pigfish             | BC            | <a href="#">Fishbase/bodianus-izuensis</a>          | Aquarium                |

| Species                                                       | CAAB Code    | Australian Standard Name   | Trophic Group | Fishbase Trophic and Habitat Information          | Fisheries         |
|---------------------------------------------------------------|--------------|----------------------------|---------------|---------------------------------------------------|-------------------|
| <i>Bodianus masudai</i><br>Araga & Yoshino, 1975              | 3738422<br>1 |                            | BC            | <a href="#">Fishbase/bodianus-masudai</a>         |                   |
| <i>Cheilinus undulatus</i><br>Rüppell, 1835                   | 3738403<br>8 | Humphead Maori Wrasse      | GC            | <a href="#">Fishbase/cheilinus-undulatus</a>      | Yes, and Aquarium |
| <i>Choerodon venustus</i><br>(De Vis, 1884)                   | 3738404<br>2 | Venus Tuskfish             | Unknown       | <a href="#">Fishbase/choerodon-venustus</a>       |                   |
| <i>Cirrhilabrus punctatus</i><br>Randall & Kuiter, 1989       | 3738408<br>3 | Finespot Wrasse            | Unknown       | <a href="#">Fishbase/cirrhilabrus-punctatus</a>   | Aquarium          |
| <i>Cirrhilabrus roseafascia</i><br>Randall & Lubbock, 1982    | 3738421<br>8 | Pink-Banded Fairy Wrasse*  | Unknown       | <a href="#">Fishbase/cirrhilabrus-roseafascia</a> | Aquarium?         |
| <i>Coris dorsomacula</i><br>Fowler, 1908                      | 3738409<br>3 | Pinklined Wrasse           | Unknown       | <a href="#">Fishbase/coris-dorsomacula</a>        | Aquarium          |
| <i>Labroides dimidiatus</i><br>(Valenciennes, 1839)           | 3738402<br>8 | Common Cleanerfish         | GC            | <a href="#">Fishbase/labroides-dimidiatus</a>     | Aquarium          |
| <i>Oxycheilinus digrammus</i><br>(Lacépède, 1801)             | 3738406<br>5 | Violetline Maori Wrasse    | BC            | <a href="#">Fishbase/oxycheilinus-digrammus</a>   | Yes, and Aquarium |
| <i>Oxycheilinus orientalis</i><br>Günther, 1862               | 3738403<br>0 | Oriental Maori Wrasse      | GC            | <a href="#">Fishbase/oxycheilinus-orientalis</a>  | Yes, and Aquarium |
| <i>Terelabrus rubrovittatus</i><br>Randall & Fourmanoir, 1998 | 3738421<br>0 | Yellowbar Hogfish*         | Unknown       | <a href="#">Fishbase/terelabrus-rubrovittatus</a> |                   |
| Pinguipedidae                                                 |              |                            |               |                                                   |                   |
| <i>Parapercis nebulosa</i><br>(Quoy & Gaimard, 1825)          | 3739000<br>5 | Pinkbanded Grubfish        | BC            | <a href="#">Fishbase/parapercis-nebulosa</a>      | Aquarium          |
| Blenniidae                                                    |              |                            |               |                                                   |                   |
| <i>Meiacanthus luteus</i><br>Smith-Vaniz, 1987                | 3740805<br>4 | Yellow Fangblenny          | Unknown       | <a href="#">Fishbase/meiacanthus-luteus</a>       |                   |
| Acanthuridae                                                  |              |                            |               |                                                   |                   |
| <i>Acanthurus xanthopterus</i><br>Valenciennes, 1835          | 3743702<br>0 | Yellowmask Surgeonfish     | H, PL         | <a href="#">Fishbase/acanthurus-xanthopterus</a>  | Yes, and Aquarium |
| <i>Naso caesi</i><br>Randall & Bell, 1992                     | 3743704<br>6 | Silverblotched Unicornfish | PL            | <a href="#">Fishbase/naso-caesi</a>               |                   |
| Scombridae                                                    |              |                            |               |                                                   |                   |
| <i>Gymnosarda unicolor</i><br>(Rüppell, 1836)                 | 3744102<br>9 | Dogtooth Tuna              | PI            | <a href="#">Fishbase/gymnosarda-unicolor</a>      | Yes               |
| <i>Scomberomorus commerson</i><br>(Lacépède, 1800)            | 3744100<br>7 | Spanish Mackerel           | PI            | <a href="#">Fishbase/scomberomorus-commerson</a>  | Yes               |
| Balistidae                                                    |              |                            |               |                                                   |                   |
| <i>Abalistes stellatus</i><br>(Anonymous, 1798)               | 3746501<br>1 | Starry Triggerfish         | Unknown       | <a href="#">Fishbase/abalistes-stellatus</a>      |                   |
| <i>Balistoides conspicillum</i><br>(Bloch & Schneider, 1801)  | 3746503<br>1 | Clown Triggerfish          | BC            | <a href="#">Fishbase/balistoides-conspicillum</a> | Yes               |
| <i>Sufflamen bursa</i><br>(Bloch & Schneider, 1801)           | 3746507<br>8 | Pallid Triggerfish         | BC            | <a href="#">Fishbase/sufflamen-bursa</a>          | Yes               |
| <i>Sufflamen fraenatum</i><br>(Latreille, 1804)               | 3746501<br>4 | Bridled Triggerfish        | BC            | <a href="#">Fishbase/sufflamen-fraenatum</a>      | Yes               |
| Tetraodontidae                                                |              |                            |               |                                                   |                   |

| Species                                      | CAAB<br>Code | Australian<br>Standard<br>Name | Trophic<br>Group | Fishbase Trophic and<br>Habitat Information         | Fisheries |
|----------------------------------------------|--------------|--------------------------------|------------------|-----------------------------------------------------|-----------|
| <i>Trionodon macropterus</i><br>Lesson, 1831 | 3799188<br>5 | Threetooth<br>Puffer*          | PL, BC           | <a href="#">Fishbase/trionodon-<br/>macropterus</a> |           |

**Table S2:** Each habitat variable was compared in a simple linear model to principal components to see how different habitat gradients could explain the variation in the two major components (PC1 and PC2) between the trophic communities. Residual standard error is a measure of the quality of a linear regression fit and reported for a model with 45 degrees of freedom. Multibeam information from the  $50 \times 50$  kernel was used. For planar curvature, absolute values were compared. Significance values are expressed as \* (\*\*  $p < 0.01$  and \*  $p < 0.05$ ). Non-significant variables (not listed in table) included curvature, range, topographic position index, epibenthic categories (filterers, encrusting organisms, coral, *Halimeda*) and substratum categories (boulders, gravel, indeterminate substratum, mud, rubble).

| Environmental variable                 |                  | Residual<br>Standard Error | R <sup>2</sup> | p-<br>value | Residual<br>Standard Error | R <sup>2</sup> | p-<br>value |
|----------------------------------------|------------------|----------------------------|----------------|-------------|----------------------------|----------------|-------------|
| Depth (category)                       | Deep             | 0.55                       | 0.20           | NS          | 0.61                       | 0.02           | NS          |
|                                        | Middle           |                            |                | NS          |                            |                |             |
|                                        | Shallow          |                            |                | **          |                            |                |             |
| Location (category)                    | Myrmidon         | 0.61                       | 0.04           | NS          | 0.61                       | 0.02           | NS          |
|                                        | Transect         |                            |                | NS          |                            |                | NS          |
|                                        | Northern         |                            |                | NS          |                            |                | NS          |
|                                        | Submerged Shoals |                            |                | NS          |                            |                | NS          |
|                                        | Viper            |                            |                | NS          |                            |                | NS          |
|                                        |                  | PC1                        |                |             | PC2                        |                |             |
| Depth                                  |                  | 0.54                       | 0.20           | **          | 0.60                       | 0.04           | NS          |
| Aspect (combined Easting and Northing) |                  | 0.58                       | 0.09           | *           | 0.56                       | 0.01           | NS          |
| Average Depth                          |                  | 0.57                       | 0.13           | *           | 0.54                       | 0.08           | NS          |
| Planar Curvature                       |                  | 0.58                       | 0.09           | *           | 0.56                       | 0.02           | NS          |
| Slope                                  |                  | 0.60                       | 0.03           | NS          | 0.52                       | 0.13           | *           |
| Standard Deviation                     |                  | 0.60                       | 0.07           | NS          | 0.53                       | 0.09           | *           |
| Surface Ratio                          |                  | 0.57                       | 0.10           | *           | 0.54                       | 0.09           | NS          |
| Bare                                   |                  | 0.55                       | 0.19           | **          | 0.61                       | 0.00           | NS          |
| Plants                                 |                  | 0.55                       | 0.18           | **          | 0.60                       | 0.03           | NS          |
| Bedrock                                |                  | 0.56                       | 0.15           | **          | 0.59                       | 0.05           | NS          |
| Calcified Reef                         |                  | 0.58                       | 0.09           | *           | 0.61                       | 0.00           | NS          |
| Sand                                   |                  | 0.57                       | 0.12           | *           | 0.60                       | 0.03           | NS          |
