# Supplementary material
Source: MDPI journal article supplement (https://www.mdpi.com/1424-2818/11/2/26)

## Myrmidon

### Shallow (54-107 m)

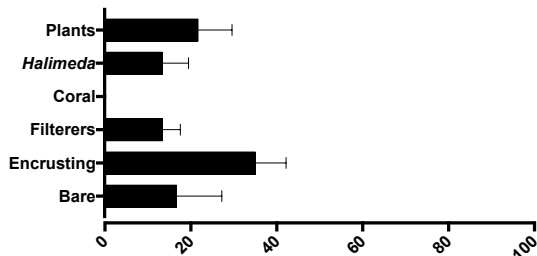

## NSS & Transect

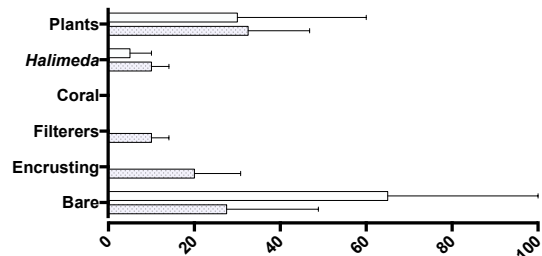

## Viper

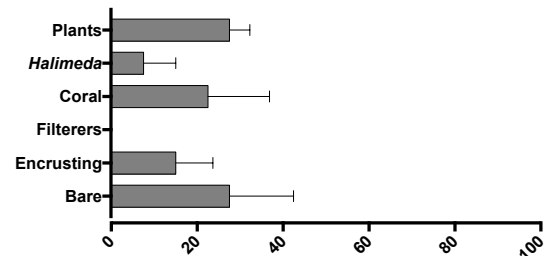

### Mid (110-156 m)

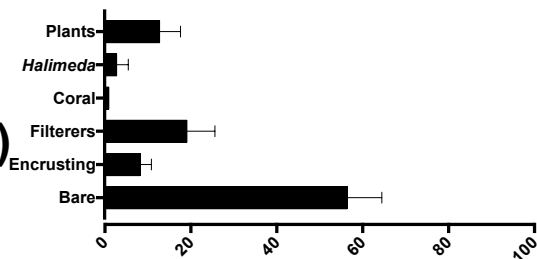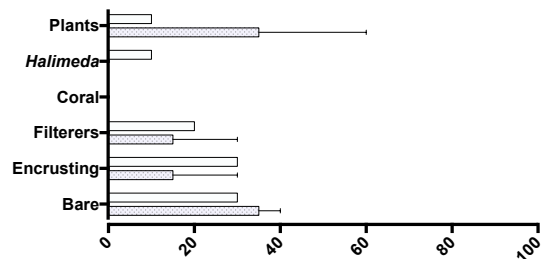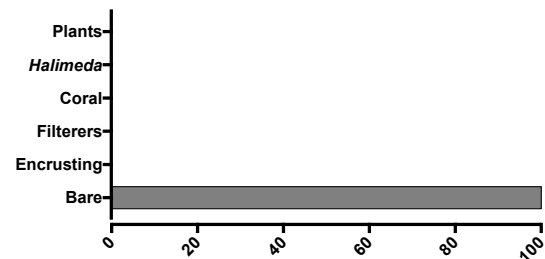

### Deep (160-260 m)

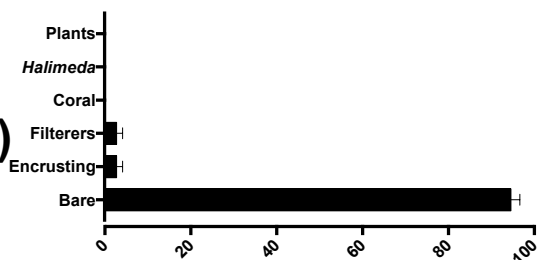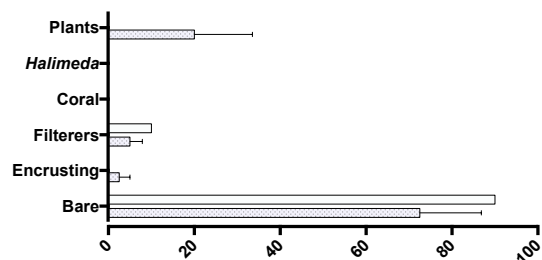

Average percent cover (Mean  $\pm$  SEM)

Supplement: s1 [file s1]

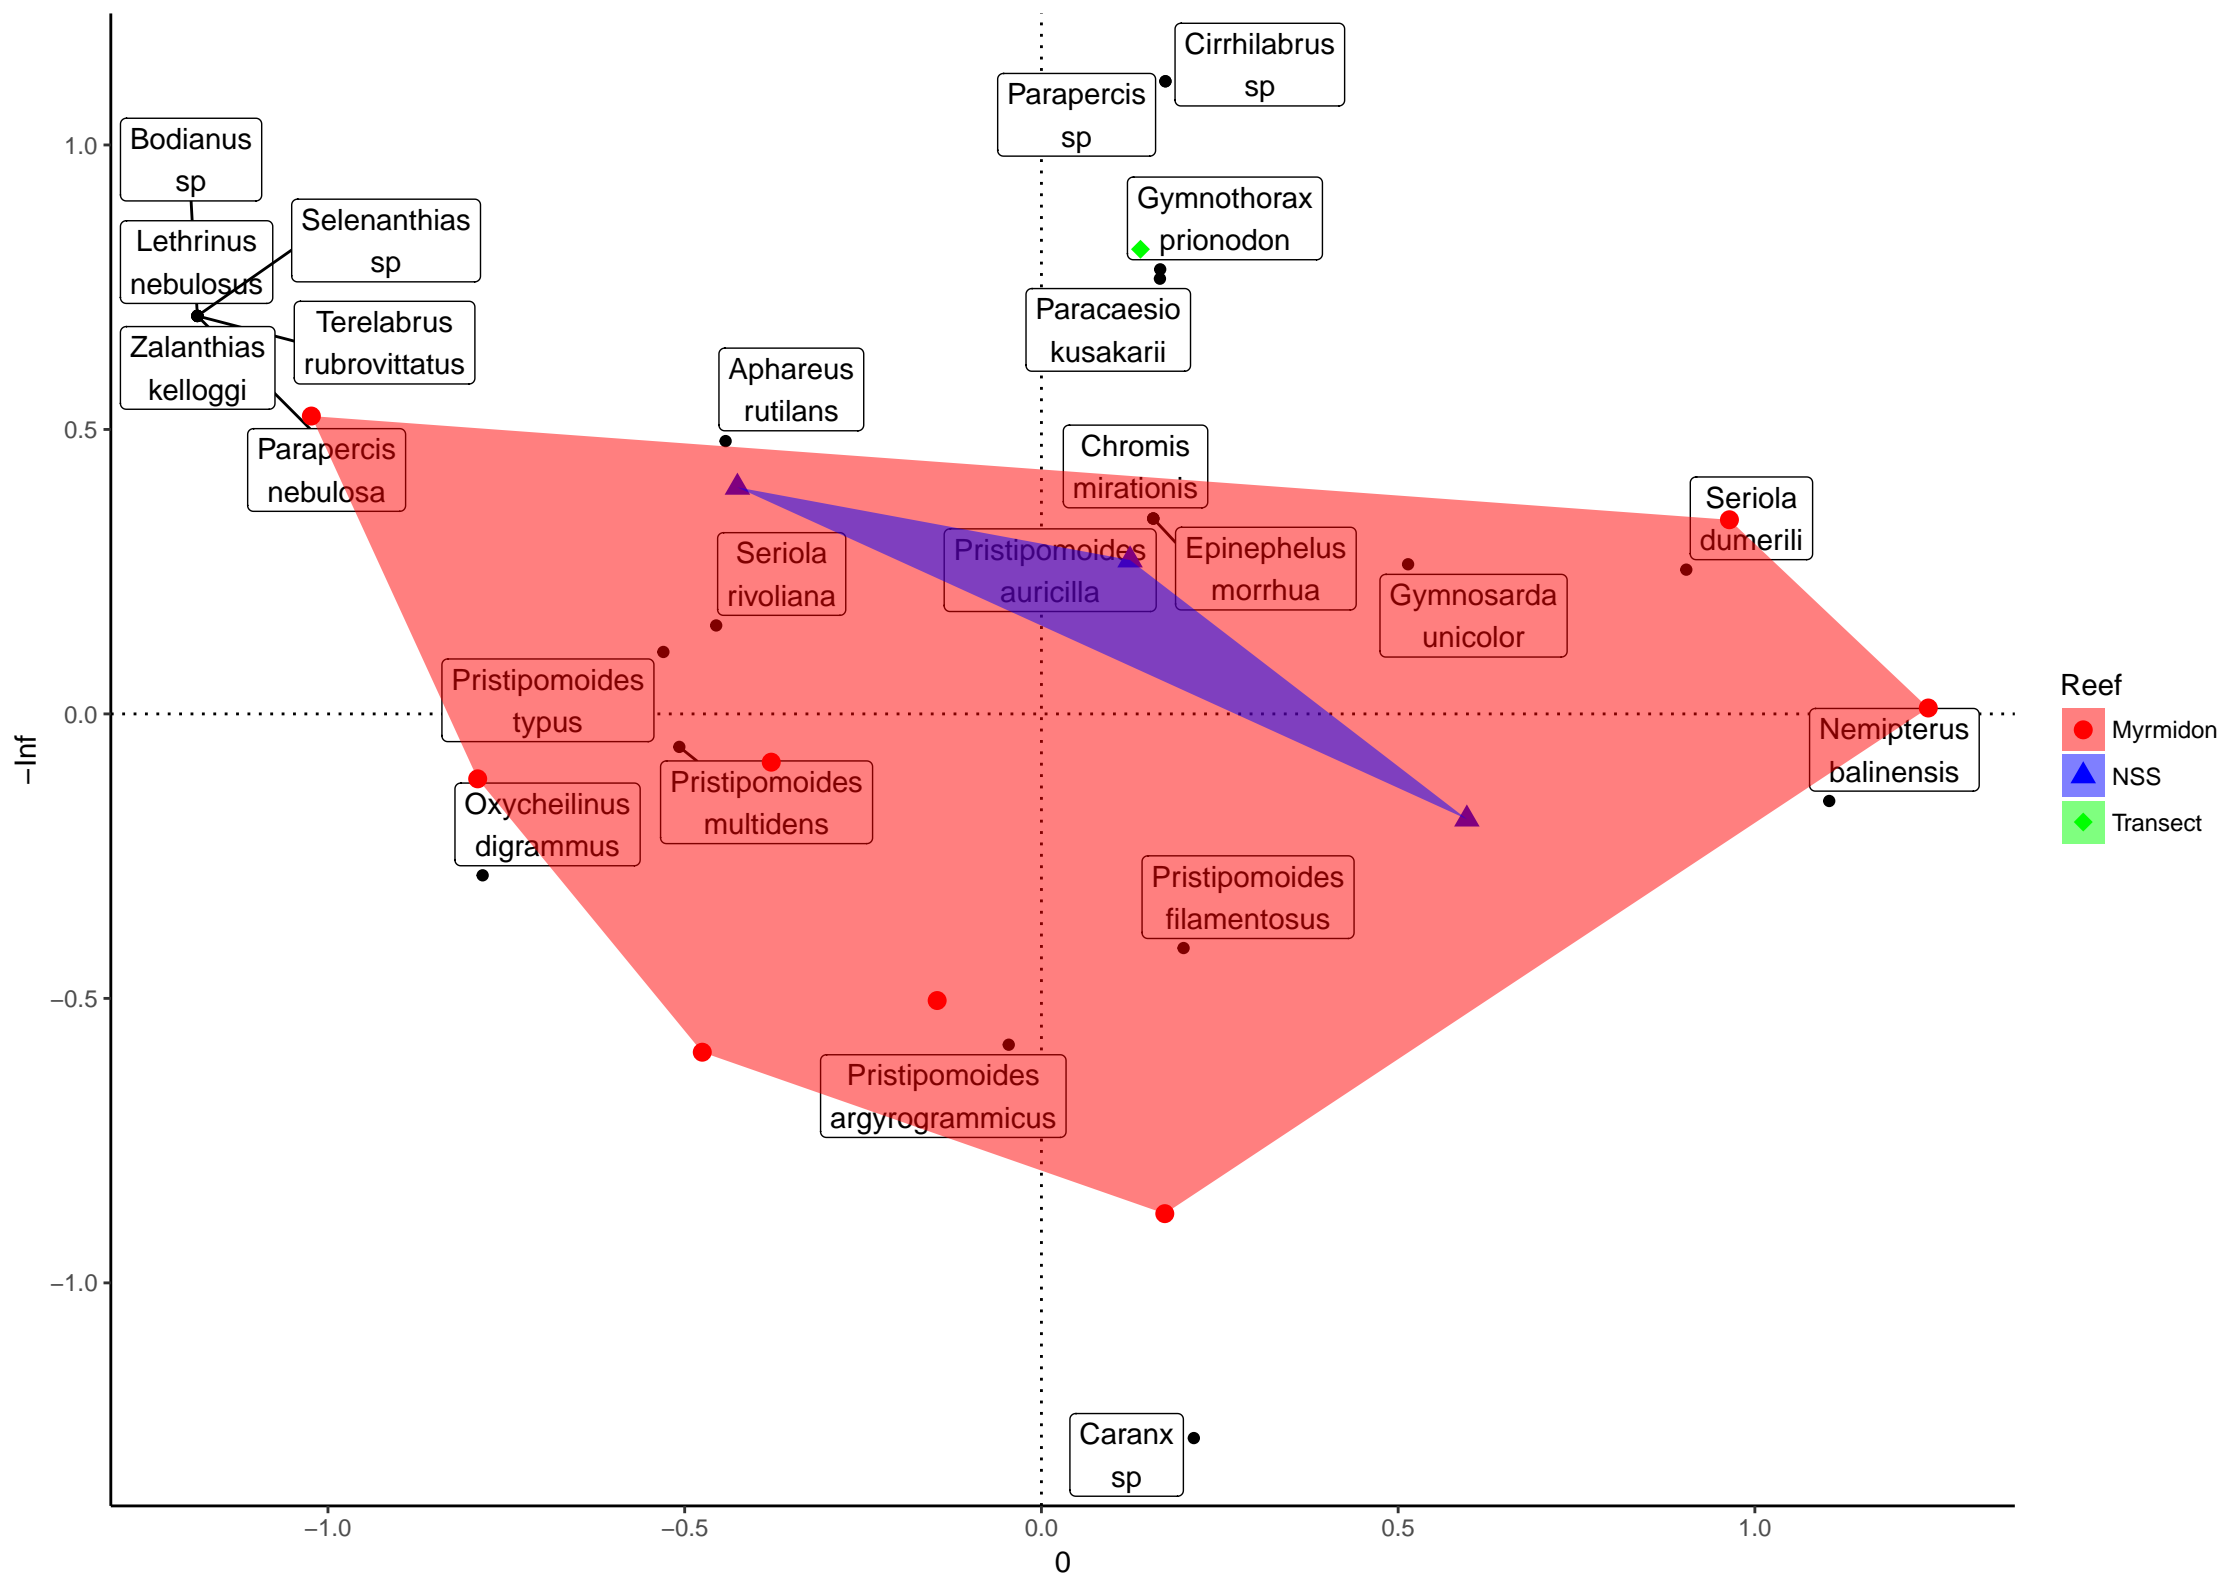

Supplement: s1 [file s1]

## Myrmidon

## NSS & Transect

## Viper

### Shallow (54-107 m)

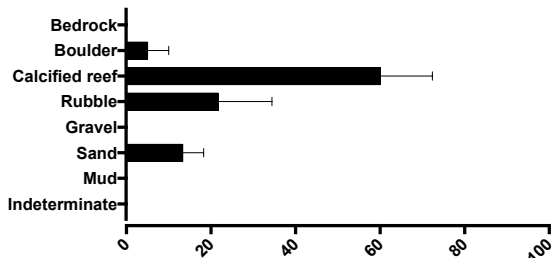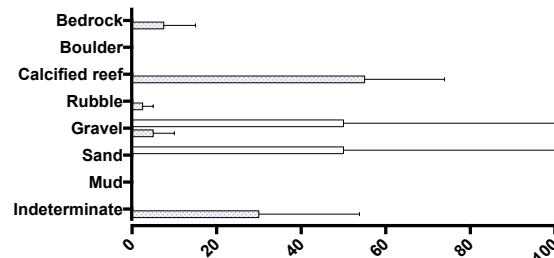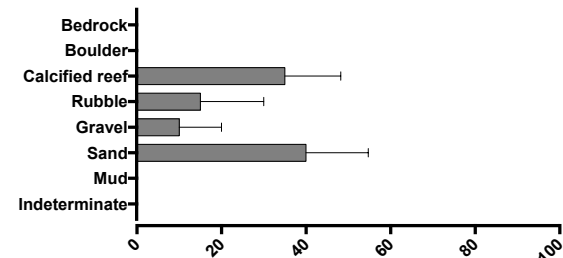

### Mid (110-156 m)

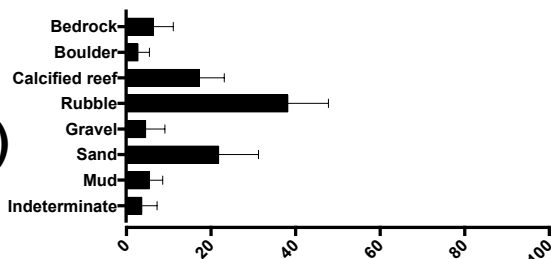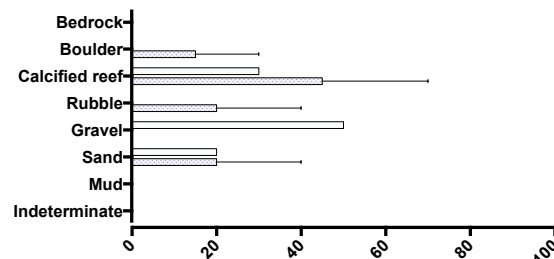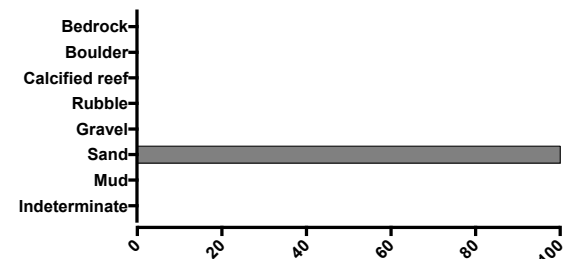

### Deep (160-260 m)

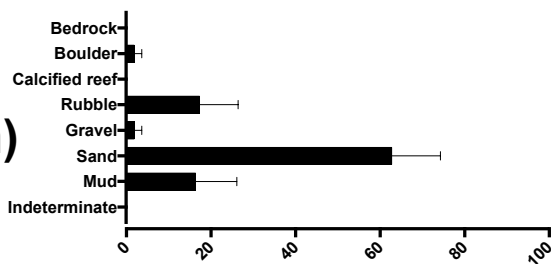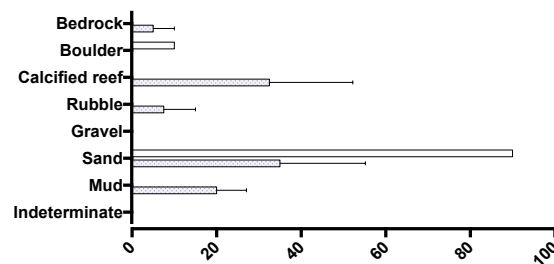

Average percent cover (Mean  $\pm$  SEM)

Supplement: s1 [file s1]

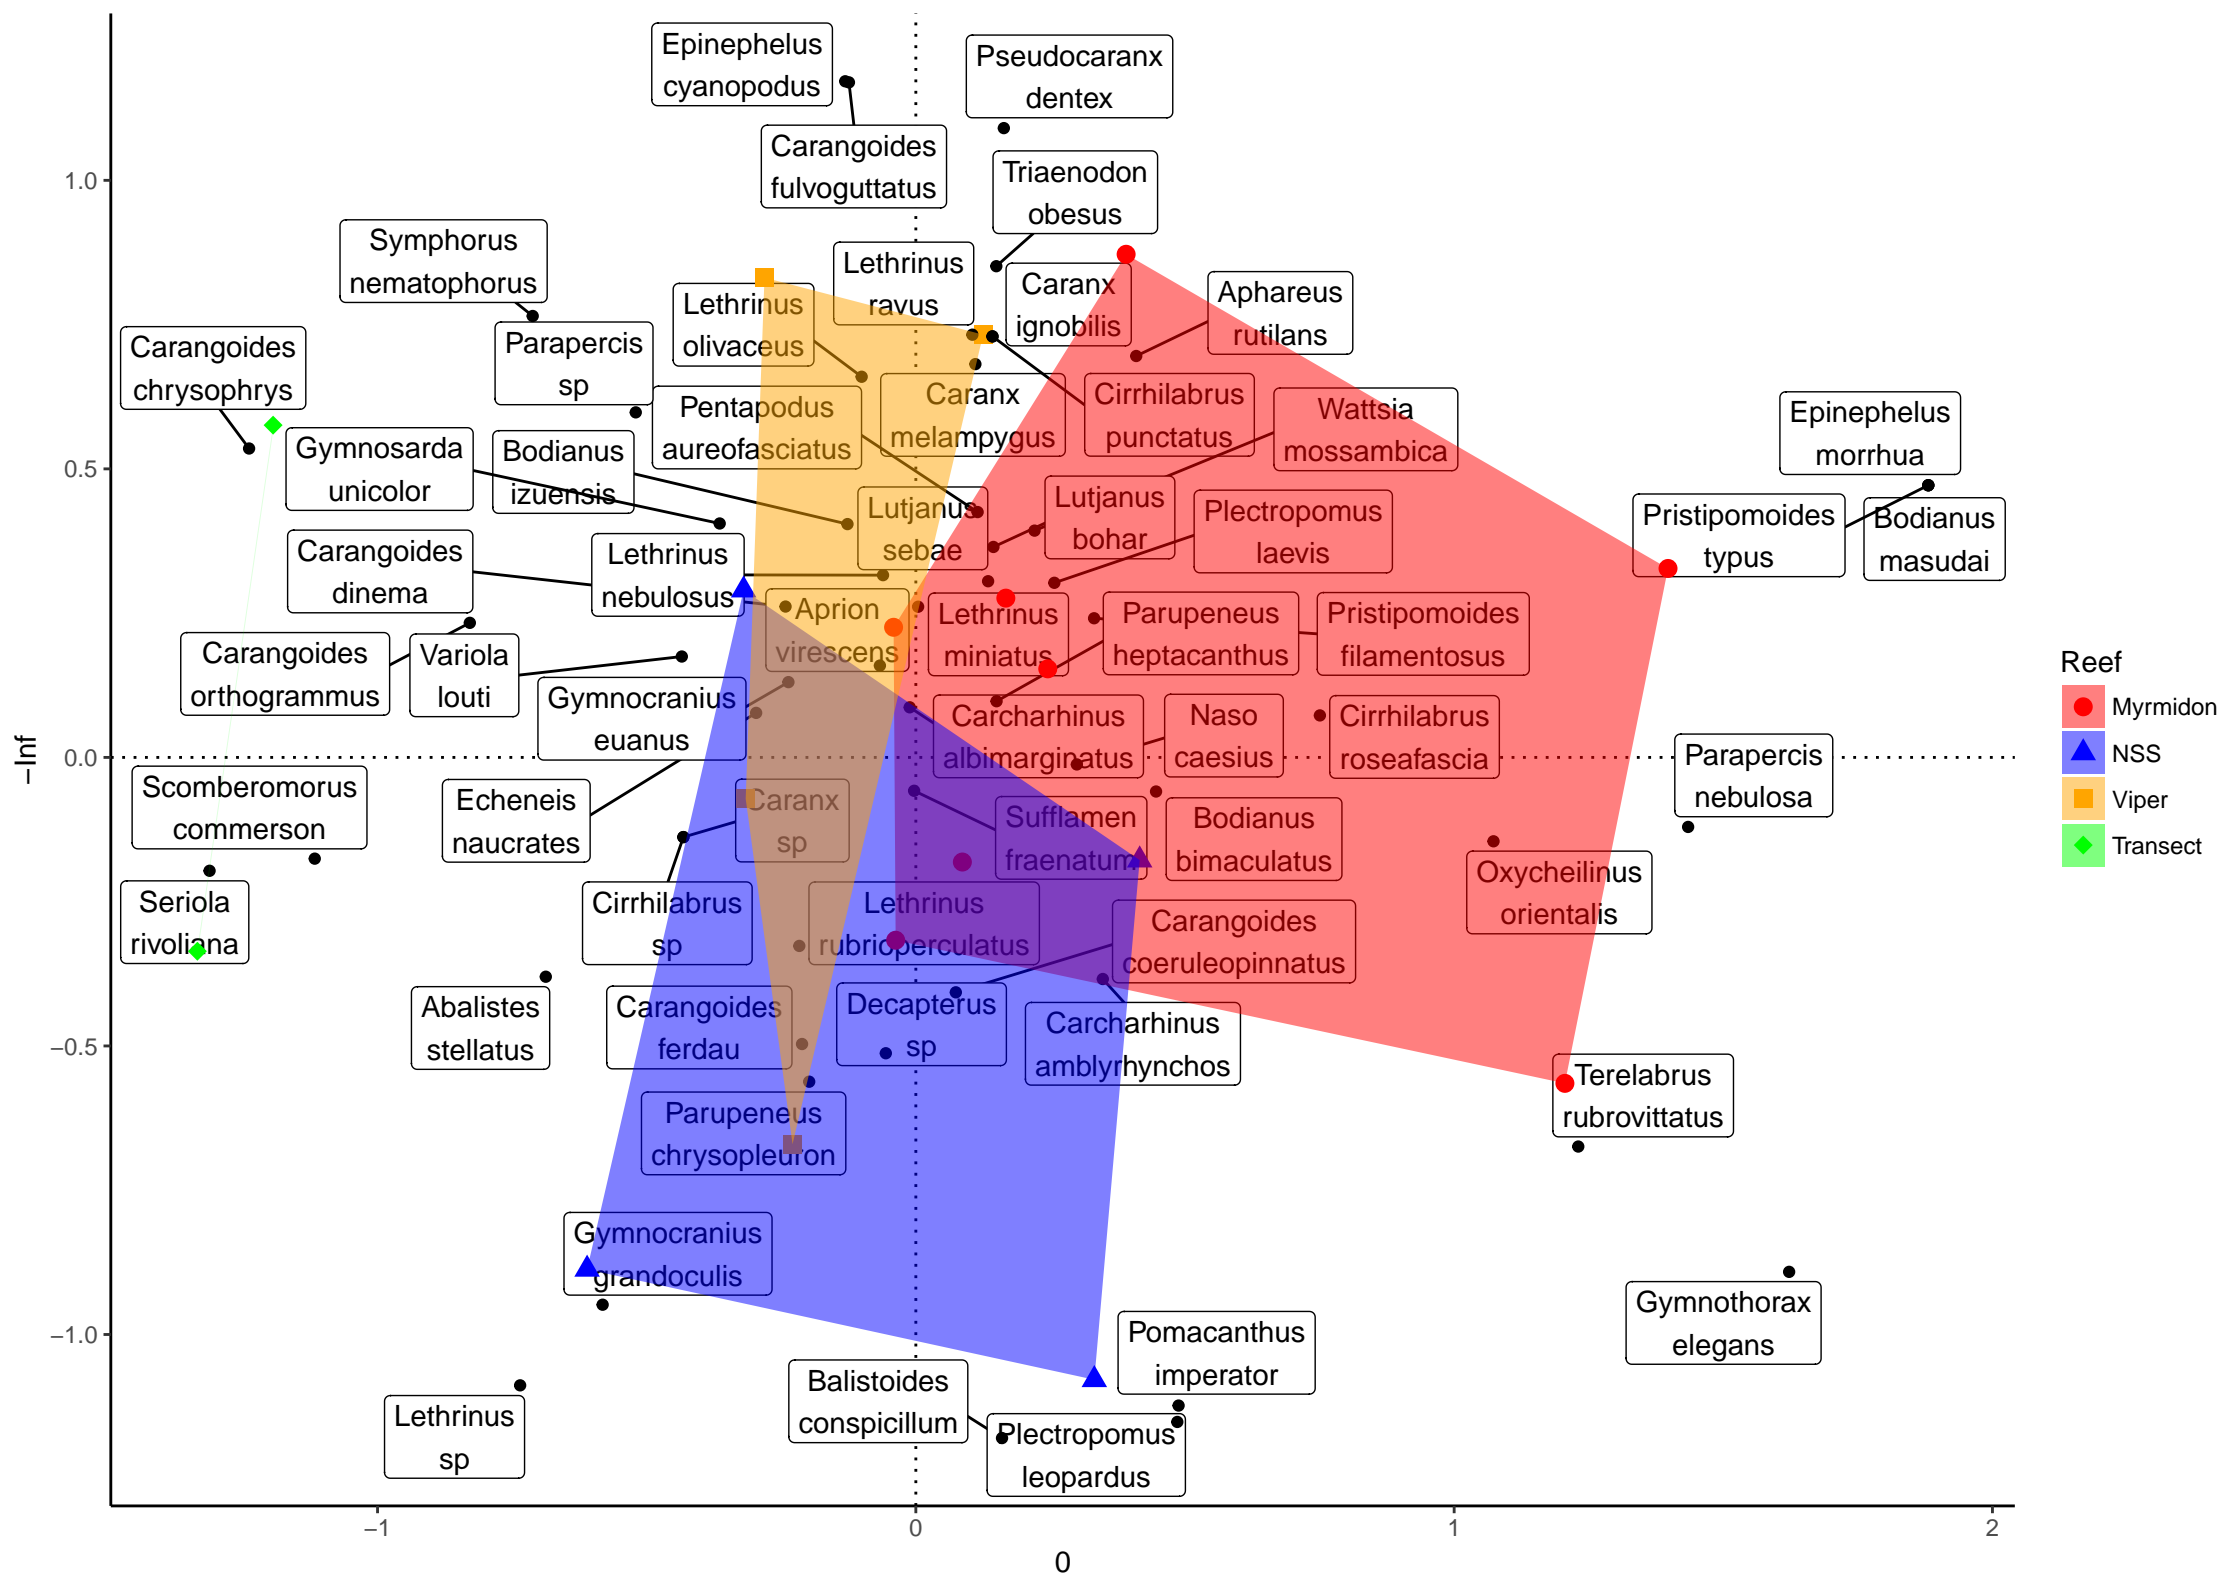

Supplement: s1 [file s1]

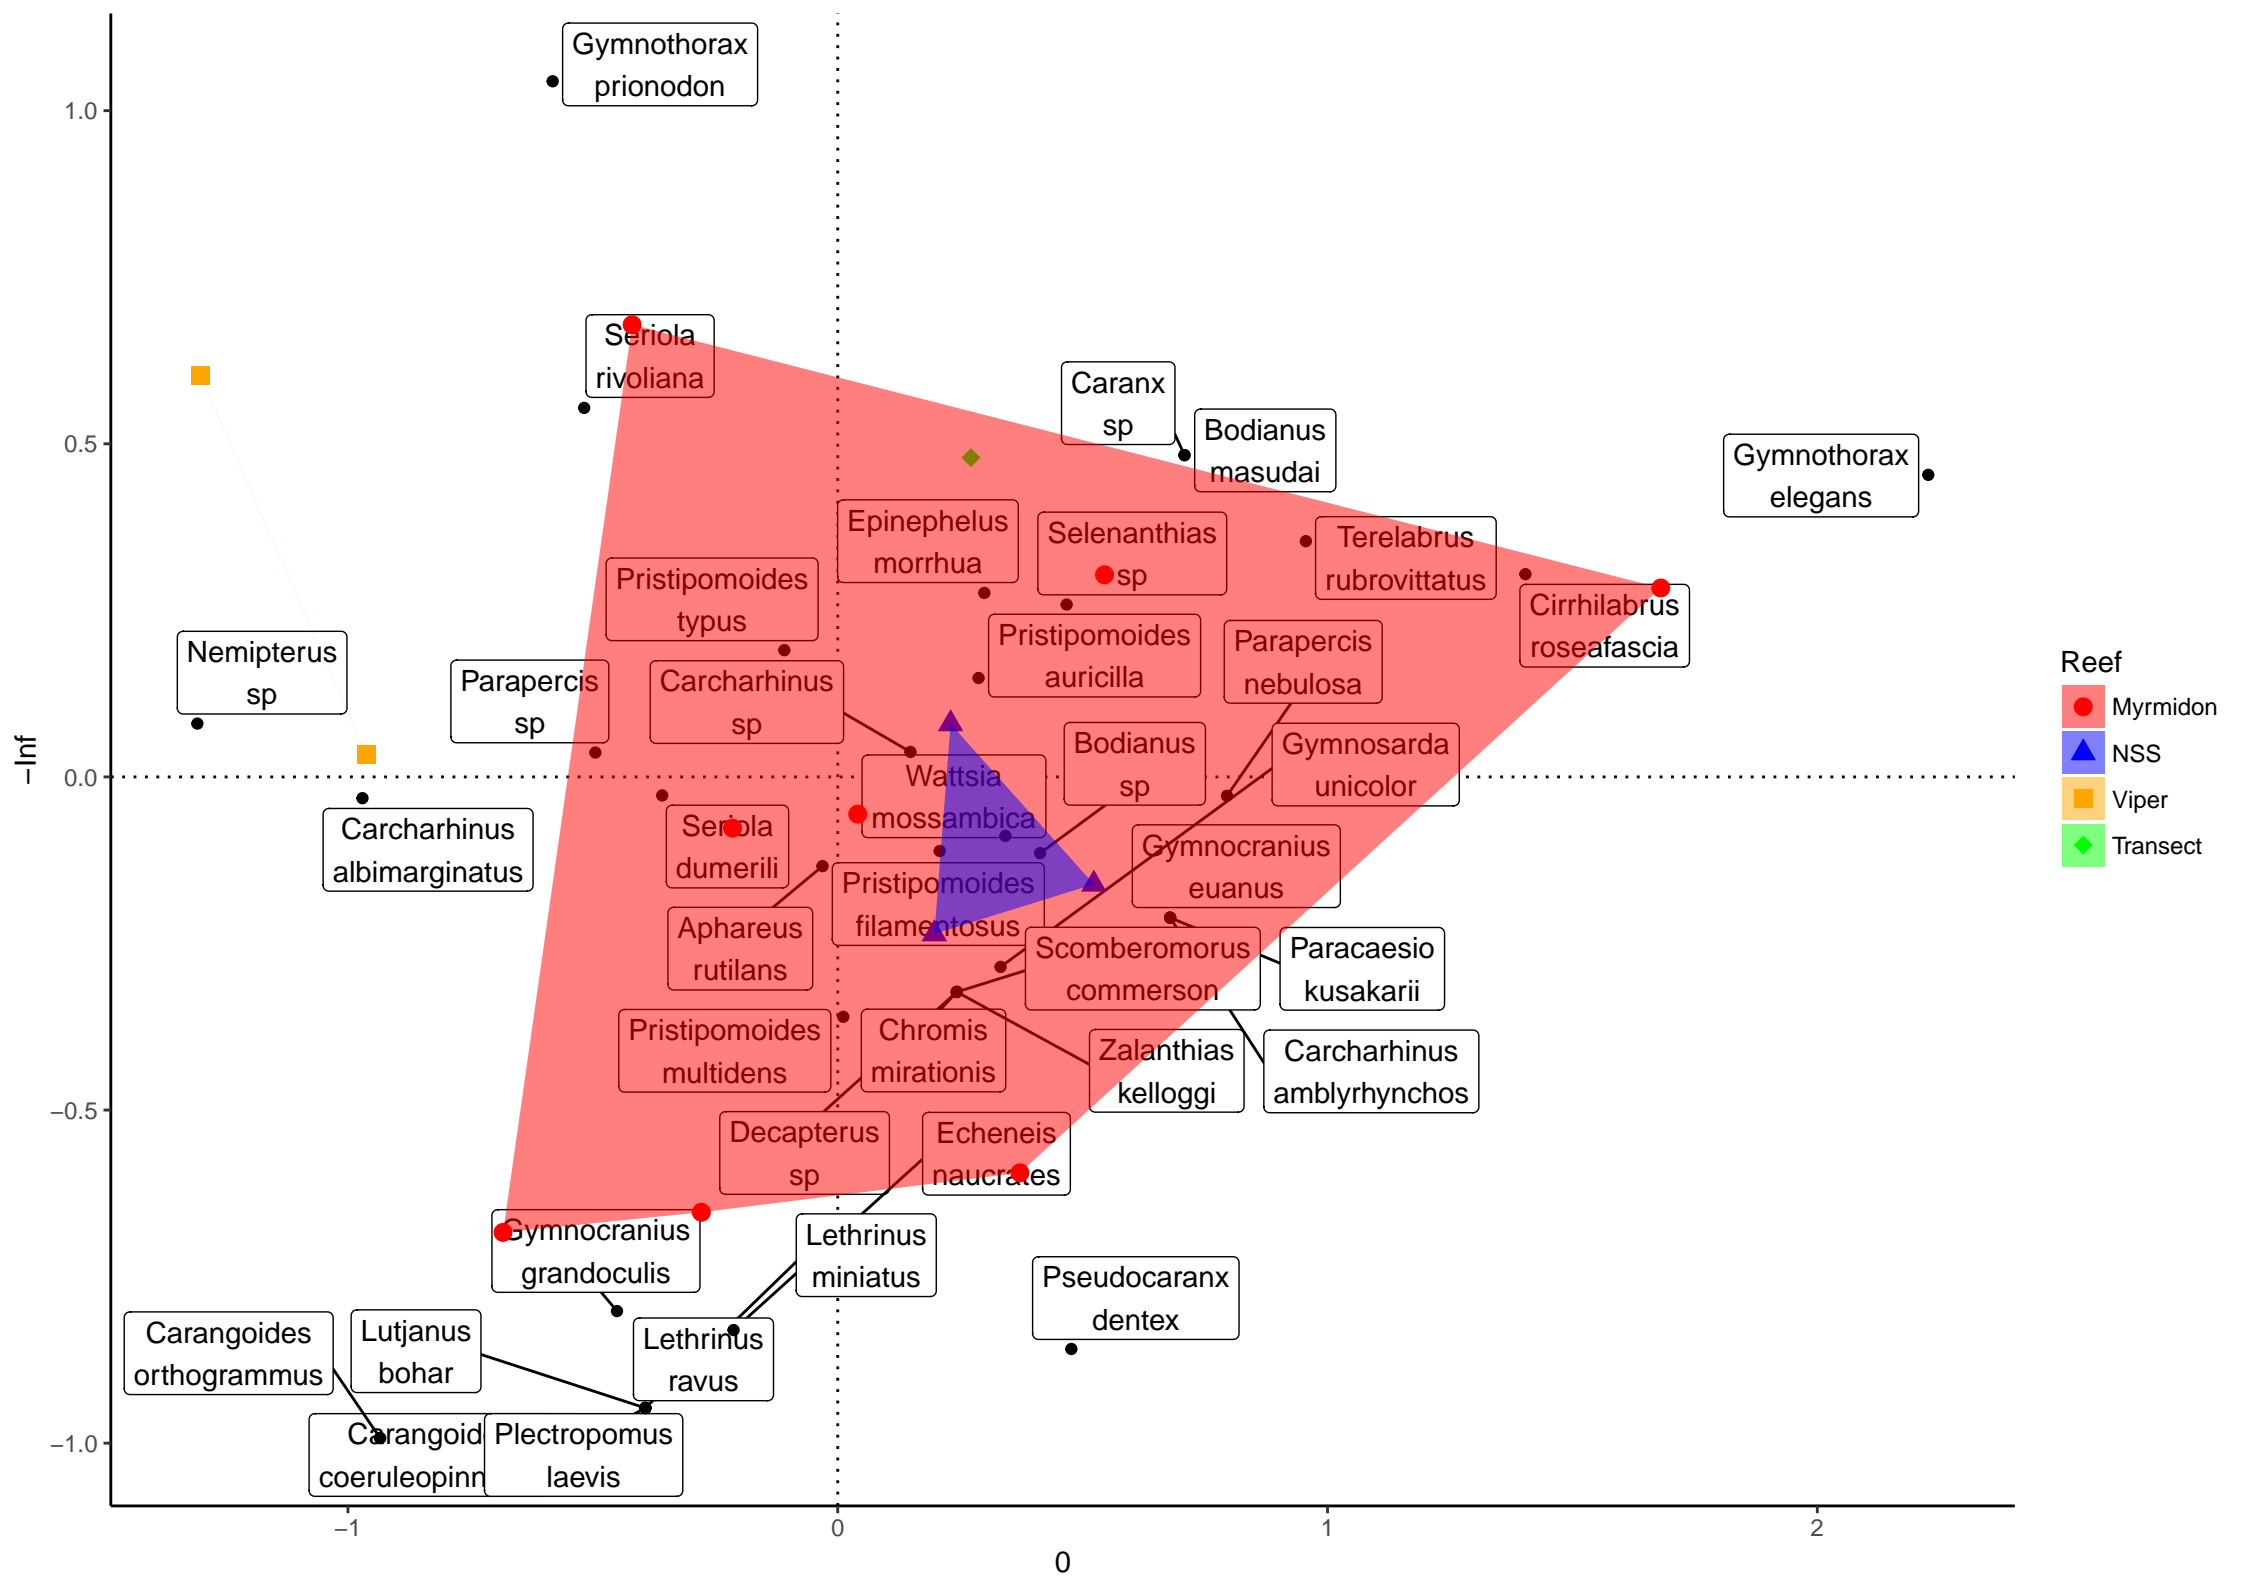

Supplement: s1 [file s1]
